# Supplementary material
Source: PubMed Central journal article supplement (PMC2739146)
Supplement: supp_136_19_3323__1.pdf [file supp_136_19_3323__1.pdf]

**Table S1. *ed* and *fred* are required in R1, R6, R7 and the cone cells for correct ommatidial rotation**

|              | <i>ed</i> MAO | <i>P</i> | <i>ed</i> s.d. | <i>P</i>            | <i>fred</i> MAO | <i>P</i> | <i>fred</i> s.d. | <i>P</i>            |
|--------------|---------------|----------|----------------|---------------------|-----------------|----------|------------------|---------------------|
| R1/R6/R7 mut | 68.8          | 0.29     | 76.1           | $5 \times 10^{-6}$  | 86.1            | 0.60     | 22.3             | $2 \times 10^{-15}$ |
| R1/R6/R7 wt  | 83.2          |          | 33.6           |                     | 87.6            |          | 9.2              |                     |
| R2/R5 mut    | 67.6          | 0.90     | 59.8           | 0.26                | 89.2            | 0.59     | 8.7              | $2 \times 10^{-12}$ |
| R2/R5 wt     | 69.1          |          | 50.4           |                     | 88.1            |          | 19.2             |                     |
| R3/R4 mut    | 45.1          | 0.13     | 60.8           | 0.07                | 87.8            | 0.68     | 9.6              | $3 \times 10^{-10}$ |
| R3/R4 wt     | 73.4          |          | 46.3           |                     | 86.8            |          | 20.7             |                     |
| cc mut       | 83            | 0.65     | 30             | $5 \times 10^{-17}$ | 92.25           | 0.79     | 17.8             | $3 \times 10^{-9}$  |
| cc wt        | 90.12         |          | 2.35           |                     | 91.01           |          | 2.52             |                     |

Mut, mutant; wt, wild type; cc, cone cell.
