# Supplementary material
Source: PubMed Central journal article supplement (PMC2739146)
Supplement: supp_136_19_3323__2.pdf [file supp_136_19_3323__2.pdf]

**Table S2. Stbm is required in R7 for rotation**

|        | MAO   | <i>P</i>             | s.d.  | <i>P</i>               |
|--------|-------|----------------------|-------|------------------------|
| R1 wt  | 89.23 |                      | 12.37 |                        |
| R1 mut | 88.38 | 0.51                 | 12.94 | 0.55                   |
| R2 wt  | 88.51 |                      | 15.02 |                        |
| R2 mut | 88.75 | 0.87                 | 11.46 | $2.0 \times 10^{-4}$   |
| R3 wt  | 89.55 |                      | 12.36 |                        |
| R3 mut | 88.46 | 0.48                 | 12.84 | 0.69                   |
| R4 wt  | 89.04 |                      | 12.04 |                        |
| R4 mut | 87.88 | 0.43                 | 14.18 | 0.03                   |
| R5 wt  | 89.45 |                      | 12.06 |                        |
| R5 mut | 87.93 | 0.22                 | 13.33 | 0.16                   |
| R6 wt  | 91.1  |                      | 10.42 |                        |
| R6 mut | 86.73 | $3.9 \times 10^{-4}$ | 14.02 | $4.00 \times 10^{-5}$  |
| R7 wt  | 89.27 |                      | 5.6   |                        |
| R7 mut | 88.33 | 0.39                 | 15.72 | $1.05 \times 10^{-35}$ |
